# Supplementary material for: The lncRNA CASC15 regulates SOX4 expression in RUNX1-rearranged acute leukemia
Source: Springer Nature journal article supplement (doi:10.1186/s12943-017-0692-x), 2017-07-19
Supplement: MOESM1 [file 13314916]

## RT-qPCR primers

|             |      |                                 |
|-------------|------|---------------------------------|
| CASC15      | FOW1 | 5' CGCCGGGGTATCTCCCTCTCG 3'     |
|             | REV1 | 5' CATTTCCCCGCTGCAGTCCA 3'      |
|             | FOW2 | 5' TGGAGTCCAAGTGTGACTGCCAAG 3'  |
|             | REV2 | 5' TCCTCTGGGTTTTCCATGCGTGT 3'   |
| SOX4        | FOW  | 5' AGCGACAAGATCCCTTTCATTC 3'    |
|             | REV  | 5' CGTTGCCGGACTTCACCTT 3'       |
| PRL1        | FOW  | 5' GGGGTTTCATTACCAAGGCCA 3'     |
|             | REV  | 5' TGGATAGGATAGCCTCCGGG 3'      |
| MYC         | FOW  | 5' CCACAGCAAACCTCCTCACAG 3'     |
|             | REV  | 5' GCAGGATAGTCCTTCCGAGTG 3'     |
| ACTIN       | FOW  | 5' CATGTACGTTGCTATCCAGGC 3'     |
|             | REV  | 5' CTCCTTAATGTCACGCACGAT 3'     |
| RAPGEF4     | FOW  | 5' CACCTCTCATTGAACCTCACG 3'     |
|             | REV  | 5' GTCCGGGAGTGAACACATGG 3'      |
| JUN         | FOW  | 5' TCCAAGTGCCGAAAAAGGAAG 3'     |
|             | REV  | 5' CGAGTTCTGAGCTTTCAAGGT 3'     |
| LOC729177   | FOW  | 5' AGATCACAGTGGACAGCCACTCA 3'   |
|             | REV  | 5' CAAATATTGGCTGCCTTAAGCTCTC 3' |
| L32 (mouse) | FOW  | 5' AAGCGAAACTGGCGGAAAC 3'       |
|             | REV  | 5' TAACCGATGTTGGGCATCAG 3'      |
| Casc15      | FOW  | 5' TGCAAGTTAGCACTGGACAA 3'      |
|             | REV  | 5' AGAATTCTCGGGCATCACACT 3'     |

**mmu-miR-155 formatted siRNA oligos**

|                            |                                                                                                                                                                                                                                                                                                                                                                                                                                                                                                                                                                                                                                                                                                                                                                                                                                                                                                                                                                                                                                                                                                                                                                                                  |
|----------------------------|--------------------------------------------------------------------------------------------------------------------------------------------------------------------------------------------------------------------------------------------------------------------------------------------------------------------------------------------------------------------------------------------------------------------------------------------------------------------------------------------------------------------------------------------------------------------------------------------------------------------------------------------------------------------------------------------------------------------------------------------------------------------------------------------------------------------------------------------------------------------------------------------------------------------------------------------------------------------------------------------------------------------------------------------------------------------------------------------------------------------------------------------------------------------------------------------------|
| CASC15-siRNA1              | 5'<br>GAAGGCTGTATGCTGAAAGTTGACCCCTCAAGTCTGAGTTTTGGCCACTGACTGACTCAGACTT<br>GGGTCAACTTTTCAGGACACAAGGCCTG 3'                                                                                                                                                                                                                                                                                                                                                                                                                                                                                                                                                                                                                                                                                                                                                                                                                                                                                                                                                                                                                                                                                        |
| CASC15-siRNA2              | 5'<br>GAAGGCTGTATGCTGTTGGCAGTCACACTTGGACTCGTTTTGGCCACTGACTGACGAGTCCAA<br>GTGACTGCCAACAGGACACAAGGCCTG 3'                                                                                                                                                                                                                                                                                                                                                                                                                                                                                                                                                                                                                                                                                                                                                                                                                                                                                                                                                                                                                                                                                          |
| CASC15-siRNA3              | 5'<br>GAAGGCTGTATGCTGAAGAAATCAAGCCTGCCCATAGTTTTGGCCACTGACTGACTATGGGCA<br>CTTGATTTCTTCAGGACACAAGGCCTG 3'                                                                                                                                                                                                                                                                                                                                                                                                                                                                                                                                                                                                                                                                                                                                                                                                                                                                                                                                                                                                                                                                                          |
| CASC15_C1-1                | CACCGTCCCGGAGCAGACAAAGAGG                                                                                                                                                                                                                                                                                                                                                                                                                                                                                                                                                                                                                                                                                                                                                                                                                                                                                                                                                                                                                                                                                                                                                                        |
| CASC15_C1-2                | AAACCCCTCTTTGTCTGCTCCGGGAC                                                                                                                                                                                                                                                                                                                                                                                                                                                                                                                                                                                                                                                                                                                                                                                                                                                                                                                                                                                                                                                                                                                                                                       |
| CASC15_C9-1                | CACCGAGGAAGTTGAAGATTTGTCC                                                                                                                                                                                                                                                                                                                                                                                                                                                                                                                                                                                                                                                                                                                                                                                                                                                                                                                                                                                                                                                                                                                                                                        |
| CASC15_C9-2                | AAACGGACAAATCTTCAACTTCCTC                                                                                                                                                                                                                                                                                                                                                                                                                                                                                                                                                                                                                                                                                                                                                                                                                                                                                                                                                                                                                                                                                                                                                                        |
| CASC15_C11-1               | CACCGGCCAATACCCACCAGAAGCA                                                                                                                                                                                                                                                                                                                                                                                                                                                                                                                                                                                                                                                                                                                                                                                                                                                                                                                                                                                                                                                                                                                                                                        |
| CASC15_C11-2               | AAACTGCTTCTGGTGGGTATTGGCC                                                                                                                                                                                                                                                                                                                                                                                                                                                                                                                                                                                                                                                                                                                                                                                                                                                                                                                                                                                                                                                                                                                                                                        |
| CASC15_C12-1               | CACCGTATTATTGGTATAATCATCA                                                                                                                                                                                                                                                                                                                                                                                                                                                                                                                                                                                                                                                                                                                                                                                                                                                                                                                                                                                                                                                                                                                                                                        |
| CASC15_C12-2               | AAACTGATGATTATACCAATAATAC                                                                                                                                                                                                                                                                                                                                                                                                                                                                                                                                                                                                                                                                                                                                                                                                                                                                                                                                                                                                                                                                                                                                                                        |
| 5' RACE Sequence<br>CASC15 | Product 1:<br>NNNNNNNNNTCTCNGGGTNNNTGCGTGTGGCGTGCTTCGGGCAGGGCTACATGC<br>TTGGGCTTTTTGGCTTTGCTGGATTCTCTTGGCAGTCACACTTGGACTCCACAGCT<br>CCATTAGCCACTTCTTCTTCTGTCTGTTTGTGTTGAGGACATCTGGTGAACAGAC<br>AATGGAGAACAGCCATCCATGGGTCGGGGGAATTGAGAAGGATGTTCAAGTAGT<br>AACCCAGGGATGACTTGGTGACGGAAAAGAAGGCACACATTTTTAAATCTGCATA<br>GGACATCAAATTAGATGTGGTTGAGCAGTAAATGCAGATCCTTCAGCTGGTAAAG<br>TTGACCCCTCAAGTCTGAGCTGAAGATTTTCTCAGAACTTTCAAATCAAGATCTAT<br>ATCTCCACAGATAACAATAATGGAGTGACTCCACCANTAGATTTTACTCGTCTCAG<br>GTAATTCTGCTGGAAAGGGAAGGAAGTAAATCTTGGANTCCTGCACTTCCATCCG<br>TTAATCATATACATGCACGCCCTCAAAGCANTAAATCACTGTCTTTCACTGTATT<br>GCCATGATTCACACCTGAAGAGCACTCATCAGTCATTCTGACTGTCTTGTGATAAT<br>GCTTCAGCAAACCCACCAGTGAAATGAGCTTGTGGCAATTCTGGAAATCTTCCC<br>CATCCAGAAAGTCTCCTACCGGAACATGCTGGGTGTTAACACATCTGTAGTCACCT<br>GAGGGTACTTCTTTAAGGTGGAGAATCCCAGCGATCAAATTGTAATCCATATAN<br>AAAANGTATCATCAAAAATTCCAATGATTTAACTTTTAAGCAACTCCAGATGAAT<br>CCAGGAATGATTTGACCTTGTATTGGTACTTCCATATTGTTGGCTGATGGAAAGAT<br>CCAGTAAGAACAACGCAGAATGAAGGAGGTCAGTGCTAGGAAGTACTCCAGCAA<br>ATTCATGATGCTTTCTAGATGCTGATAATAGTAATTACACCTTCTTCCCCACTTCGT<br>CGCACTTTTAAGGGACATTTCCCCCGCTGCAGTCCACGAGGCGTTCGGACACTTTT<br>TCCCGGCTGACAG |

|                                     |                                                                                                                                                                                                                                                                                                                                                                                                                                                                                                                                                                                                                                                                                                                                                                                                                                                                                                                                                                                                                          |
|-------------------------------------|--------------------------------------------------------------------------------------------------------------------------------------------------------------------------------------------------------------------------------------------------------------------------------------------------------------------------------------------------------------------------------------------------------------------------------------------------------------------------------------------------------------------------------------------------------------------------------------------------------------------------------------------------------------------------------------------------------------------------------------------------------------------------------------------------------------------------------------------------------------------------------------------------------------------------------------------------------------------------------------------------------------------------|
|                                     | <p>Product 2:<br/> NNNNNNNNNCTCTGGGTTNNNTGCGTGTGGCGTGCTTCGGGCAGGGCTACATGCT<br/> TGGGCTTTTTGGCTTTGCTGGATTCCCTCTTGGCAGTCACACTTGGACTCCACAGCTC<br/> CTTGACTCTGTTTATCAAGGGAGGAATCCCGACAGCATGGAGCCCCCAGGCCTCC<br/> CCTCCTCCATCAGCACAGCATGCCCGCAGTCACAAGCTGCCTGCGAGTTTGGTAA<br/> GACTCTGGCTCCAATCCCTTGGCCTCATCTGACCCGTCTTTCTGCCGTATCACTTAT<br/> CTCCTGGAAAGGAACATGTTTCCAAGCTTCTTCCACATCAGCAGTAGGAAAGGAA<br/> TTTGCAGTCTTTGAGTATTAAGTGACCATTAGCCACTTCCTTCTTCTGTCTGTTTGT<br/> TTTGAGGACATCTGGTGAAACAGACAATGGAGAACAGCCATCCATGGGTTCGGGGG<br/> GAATTGAGAAGGATGTTTCAGTAGTAACCCAGGGATGACTTGGTGACGGAAAAGA<br/> AGGCACACATTTTAAATCTGCAGAGGACATCAAATTAGATGTGGTTGAGCAGTAA<br/> ATGCAGATCCTTCAGCTGGTAAAGTTGACCCTCAAGTCTGAGCTGAAGATTTTCTC<br/> AGAACTTTCAAATCAAGATCTAGATCTCCACAGATAAGAATAATGGAGTGACTC<br/> CACCAGTAGATTTTACCTGTTGAGTTAGGAGGGTAGGAATGCAGGAAGGACAGAG<br/> GCAGGAAACAACAGTTTGGAGAACTTCTGTCCCANGCTTGAAACCCTCTTTATAA<br/> CATTCCTCTCCGTACCTTTCACATCTTACAGTCACTAAGTCCTGACTTTTCTGTT<br/> TCATCAAAGCCAGCAAACGCAGTGTTCCGGATCCGCGA</p> |
| <p>3' RACE Sequence<br/> CASC15</p> | <p>Product1:<br/> NNNNNNNNNNNNNNNNNNNNNNNNNNNNNNNNNNNNNNNNNNNGCCTNNGAGTTCTCATTTNTGTTNNCCTCTGG<br/> AAACCACATGTGTACCTTGTTTGCAACAGTATGGGTTCCGGANGCNNAAGAATTTTCCTTGCTTGGA<br/> TGAGACTTTTGACTTNTTNTTTGGGTTAANTTCTNNAGAGTCTCCTTGCTTCTGATTCTACATCTCCAT<br/> CCATGGGCCACTGTTTCAACAACCTCANCCAGTGCAACACAACCTCATCCAAGAAGAGTATGCAGAGA<br/> AAGGACTCCCCTACCTGCCACAAAAGTGTGTCTGAAAAGTGTCTCATATTGTCACAAGTTGTCATTCA<br/> TTGTGAATTACACCTGTTAACATGTAATCTGCAACATGCTTCACTGTCTAATTTTCCAGAGCCCCTCAT<br/> ATAAGGAACTGTATTATTGGTATAATCATCATGGTGAAGAAGTTGGTNTTCCAGAACCCCTCAT</p> <p>Product2:<br/> NNNNNNNNNNNNNNNNNNNTNNTNNTGAGAAGTTGGTANNNGGGGGAGAGANGA<br/> CAGAAACAGAGAGTAAGTCAGAGCTGGCTGCCTGACAGATAAAAAGGAAATGAC<br/> CAAAAAAAAAAAAAACCTATNNGNNTNNNATTAATTCGGATCCNGGNN</p>                                                                                                                                                                                                                                                                |

**Table S1:** Primers, siRNAs, guideRNAs and RACE sequences
