# Supplementary material for: The lncRNA CASC15 regulates SOX4 expression in RUNX1-rearranged acute leukemia
Source: Springer Nature journal article supplement (doi:10.1186/s12943-017-0692-x), 2017-07-19
Supplement: MOESM2 [file 13314916]

| Fraction | Subset             | Marker Profile                                                                |
|----------|--------------------|-------------------------------------------------------------------------------|
| A        | Pre-Pro-B          | B220 <sup>+</sup> , CD43 <sup>+</sup> , CD24 <sup>-</sup> , Ly51 <sup>-</sup> |
| B        | Pro-B              | B220 <sup>+</sup> , CD43 <sup>+</sup> , CD24 <sup>+</sup> , Ly51 <sup>-</sup> |
| C        | Pro-B/ Large pre-B | B220 <sup>+</sup> , CD43 <sup>+</sup> , CD24 <sup>+</sup> , Ly51 <sup>+</sup> |
| D        | Small Pre-B        | B220 <sup>+</sup> , CD43 <sup>-</sup> , IgM <sup>-</sup>                      |
| E        | Immature B         | B220 <sup>+</sup> , CD43 <sup>-</sup> , IgM <sup>+</sup>                      |

| Full definition                         | Abbreviation | Marker Profile                                                                                                     |
|-----------------------------------------|--------------|--------------------------------------------------------------------------------------------------------------------|
| Hematopoietic Stem Cell                 | HSC          | Lin <sup>-</sup> , c-Kit <sup>high</sup> , Sca-1 <sup>high</sup> , CD150 <sup>+</sup>                              |
| Lymphoid-primed Multipotent Progenitors | LMPP         | Lin <sup>-</sup> , c-Kit <sup>high</sup> , Sca-1 <sup>high</sup> , Flt3 <sup>+</sup> , IL-7R $\alpha$ <sup>-</sup> |
| Common Lymphoid Progenitor              | CLP          | Lin <sup>-</sup> , c-Kit <sup>low</sup> , Sca-1 <sup>low</sup> , Flt3 <sup>+</sup> , IL-7R $\alpha$ <sup>+</sup>   |
|                                         |              | * CD3e, CD8a, CD4, Gr-1, IgM, B220, CD11b, Ter119, NK-1.1, TCR $\gamma\delta$ , TCR- $\beta$                       |

\* Lin markers

**Supplementary Table 2: Antibodies used for FACS analyses.**
