# Supplementary material for: The lncRNA CASC15 regulates SOX4 expression in RUNX1-rearranged acute leukemia
Source: Springer Nature journal article supplement (doi:10.1186/s12943-017-0692-x), 2017-07-19
Supplement: MOESM4 [file 13314916]

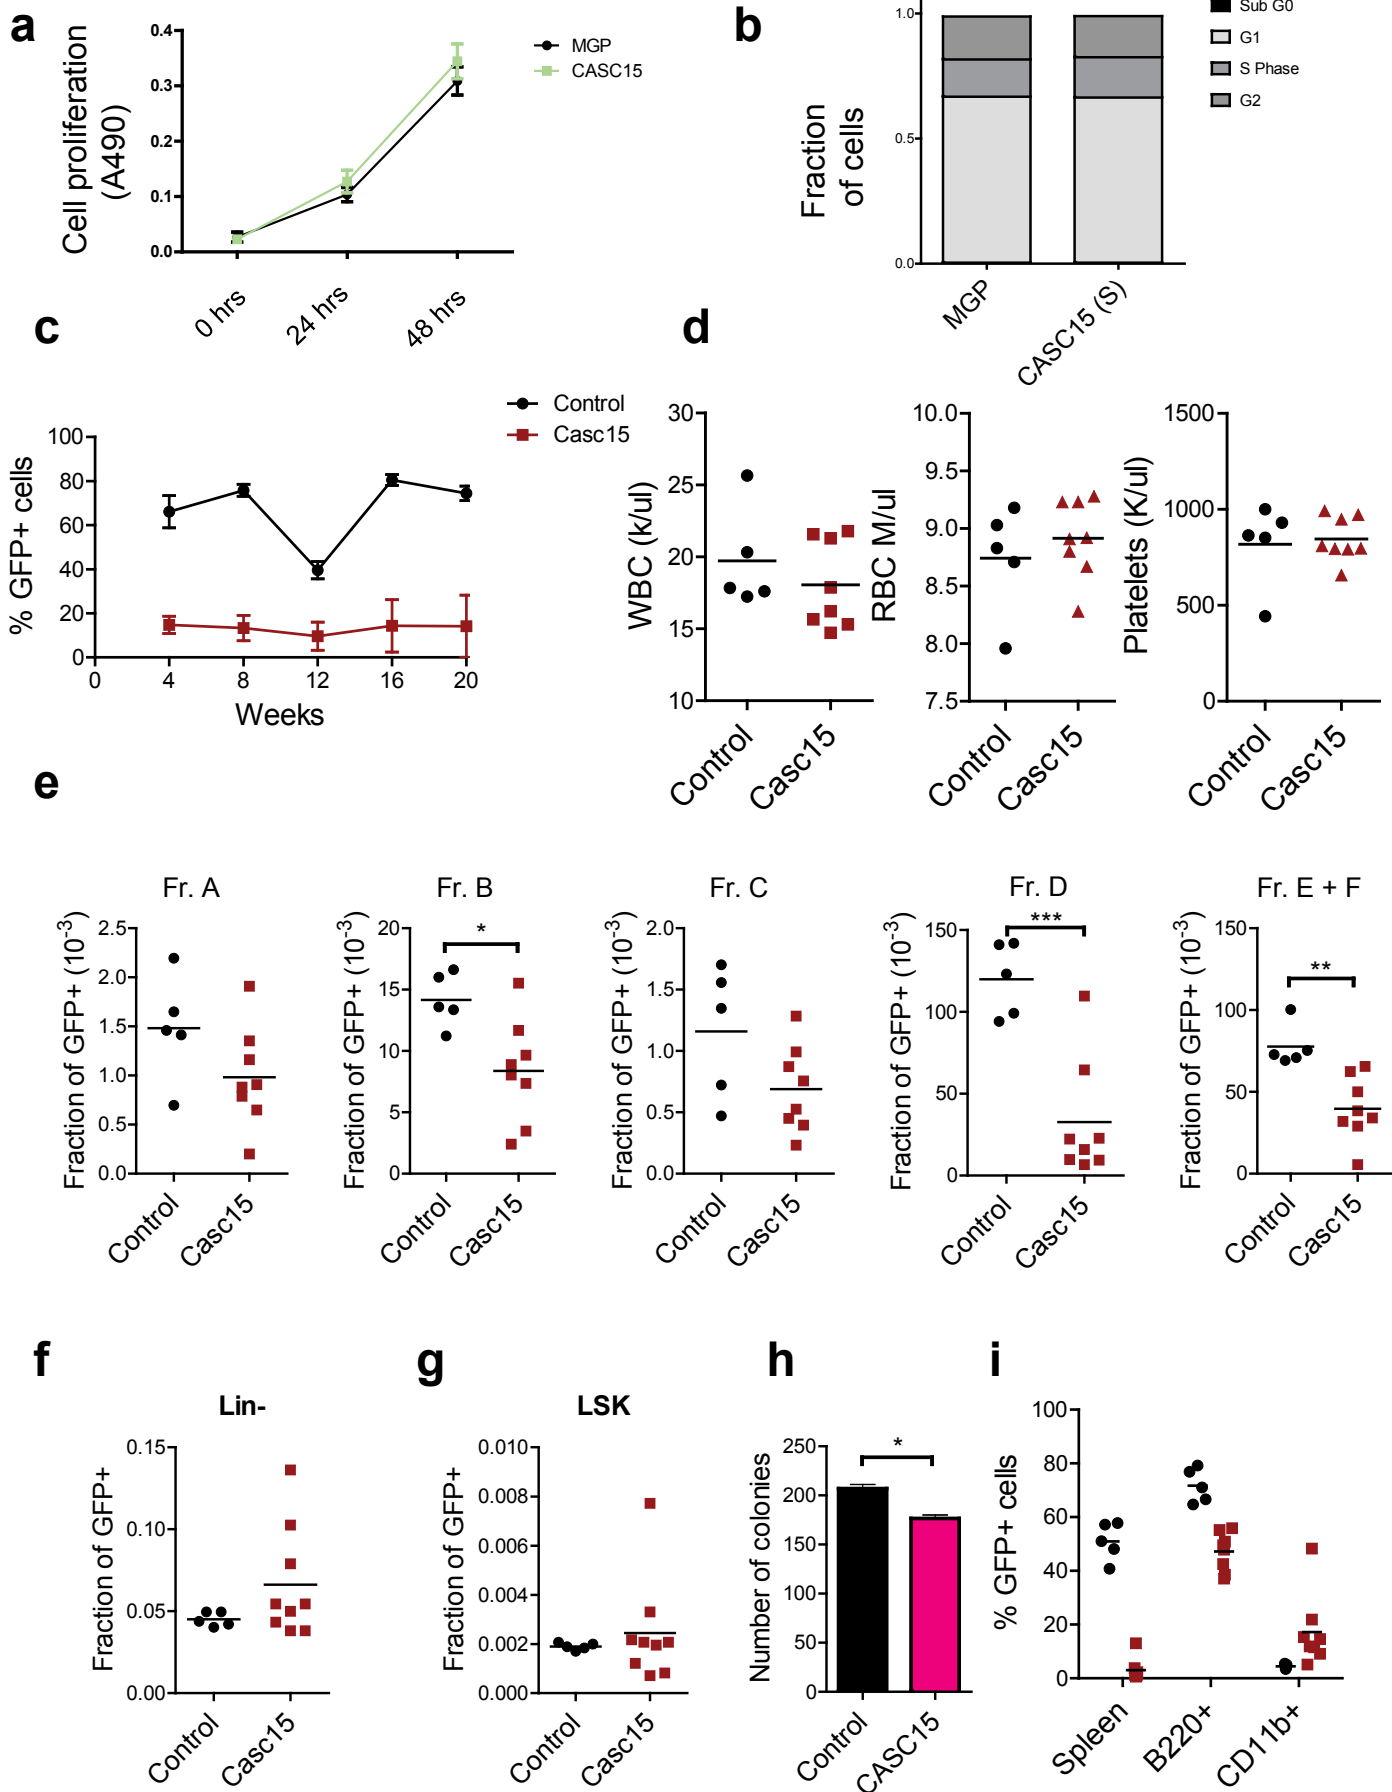

Figure S2
